# Supplementary material
Source: PubMed Central journal article supplement (PMC2290820)
Supplement: pnas_0710650105_3.pdf [file pnas_0710650105_3.pdf]

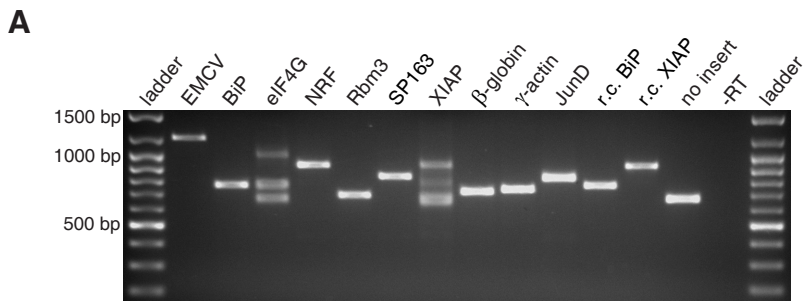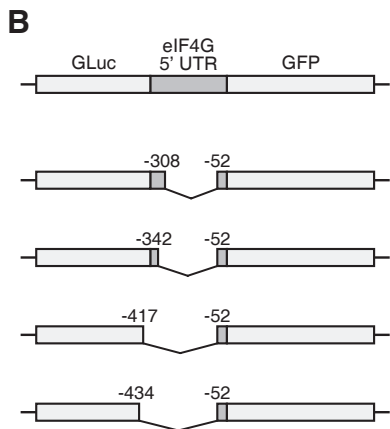

**5' splice site**

-308  
TGCTGGTGGG | **GT**AGGGATGA

-342  
GGGCCCCAGG | **GT**GTGCAGCC

-417  
CCAGGGCCAA | **GT**CGATAAGA

-434  
ACCTTCGCAA | **GCA**AGATCCA

**3' splice site**

-52  
TTATAGCTTTCTTTCCCC**AG** | AT

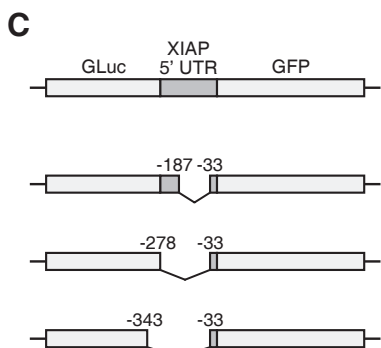

**5' splice site**

-187  
GAATGATGTG | **GT**AATGTCGA

-278  
GTTTAAACGC | **GT**ATTAGTTT

-343  
ACCTTCGCAA | **GCA**AGATCCA

**3' splice site**

-33  
ATATAATGTTCTCTTTTT**AG** | AA
