# Supplementary material
Source: PubMed Central journal article supplement (PMC2290820)
Supplement: pnas_0710650105_11.pdf [file pnas_0710650105_11.pdf]

## **BiP**

-94

CGGGCCCCCTGCCGCTGCAAGTCGGAAATTGCGCTGTGCTCCTGTGCTACGGCCTGTGGCTGGACTGCCTGCTGCTGCC  
CAACTGGCTGGCAAG<sup>ATC</sup>

## **eIF4G**

-368

TCTAGATGGGGTCTCTGGGCCCCAGGGTGTGCAGCCACTGACTTGGGGACTGCTGGTGGGGTAGGGATGAGGGAGGGAG  
GGGCATTGTGATGTACAGGGCTGCTCTGTGAGATCAAGGGTCTCTTAAGGGTGGGAGCTGGGGCAGGGACTACGAGAGC  
AGCCAGATGGGCTGAAAGTGGAACTCAAGGGGTTTCTGGCACCTACCTACCTGCTTCCCGCTGGGGGTGGGGAGTTGG  
CCCAGAGTCTTAAGATTGGGGCAGGGTGGAGAGGTGGGCTCTTCTGCTTCCCACCTCATCTTATAGCTTTCTTTCCCA  
GATCCGAATTCGAGATCCAAACCAAGGAGAAAGGATATCACAGAGCCGTACG<sup>ATC</sup>

## **NRF**

-228

GTATGTCCTTATGCTGAAAAATCTTGTTTCCTAATTAGTAAACATAAATTATTCATTTGATGGGTAAATATTTTAGGGCCGA  
TTCTTTGGTTTTATAGCCAAGATACCTGTGTGATAAAGTCTTGTGGGAGCAATTATAAGACTGGCTTATTTTGAAGCTT  
TTTTAAAAAGACATCCTTACCTGTTTTAACTGTAGATTATATTAACCTTAAATAGGTACAGCCCACGCTTGAGT<sup>ATC</sup>

## **Rbm3**

-286

TTTATAATTTCTTCTTCCAGAACGTACG<sup>ATC</sup>

## **SP163**

-163

AGCGCAGAGGCTTGGGGCAGCCGAGCGGCAGCCAGGCCCCGGCCCGGGCTCGGTTCCAGAAGGGAGAGGAGCCCGCCA  
AGGCGCGCAAGAGAGCGGGCTGCCTCGCAGTCCGAGCCGGAGAGGGAGCGCAGCCGCGCCGGCCCGGACGGCCTCCG  
AAACC<sup>ATC</sup>

## **XIAP**

-277

TATTAGTTTTATTCTGCTGCTTAAATATTACTTTCTCAAAGAGAGAAAAAAAATGCTAGATTTACTTTATGACT  
TGAATGATGTGGTAATGTGCAACTCTAGTATTTAGAATTAGAATGTTTCTTAGCGGTGCTGTAGTTATTTTATGTCAT  
AAGTGGATAATTTGTTAGCTCCTATAACAAAAGTCTGTTGCTTGTGTTTACATTTTGGATTTCCATAATATAATGTTCT  
CTTTTTAGAAAAGGTGGACAAGTCCTATTTTCAACGTACG<sup>ATC</sup>
