# Supplementary material
Source: PubMed Central journal article supplement (PMC2290820)
Supplement: pnas_0710650105_12.pdf [file pnas_0710650105_12.pdf]

**Table 2. ESTs spanning the identified splice sites**

| mRNA                       | Human                                                                                                                                                                                                                                                                                                                                                                                                                                                                                                                                     |                                                                                                                                  | Mouse                                                                                                                                                                                                                                                                                                                                                                                                       |                                 |  |
|----------------------------|-------------------------------------------------------------------------------------------------------------------------------------------------------------------------------------------------------------------------------------------------------------------------------------------------------------------------------------------------------------------------------------------------------------------------------------------------------------------------------------------------------------------------------------------|----------------------------------------------------------------------------------------------------------------------------------|-------------------------------------------------------------------------------------------------------------------------------------------------------------------------------------------------------------------------------------------------------------------------------------------------------------------------------------------------------------------------------------------------------------|---------------------------------|--|
|                            | Spliced at identified 3' ss                                                                                                                                                                                                                                                                                                                                                                                                                                                                                                               | Not spliced at identified 3' ss                                                                                                  | Spliced at identified 3' ss                                                                                                                                                                                                                                                                                                                                                                                 | Not spliced at identified 3' ss |  |
| eIF4G (variant 5)          | DA761198 DB090132<br>DB044812 DA445013<br>DA527428 BG721404<br>DB068342 DB024774<br>DB070546 DB089708<br>DB097796 DB099145<br>DB457758 BG720583<br>DB036214 DB036081<br>DB061469 DB020073<br>DB094465                                                                                                                                                                                                                                                                                                                                     |                                                                                                                                  | BB616425                                                                                                                                                                                                                                                                                                                                                                                                    |                                 |  |
| eIF4G (all other variants) | DA666630 DA759278<br>BX499813 BM468185<br>DA317324 DA773030<br>AW500724 DA701615<br>CN332372 DC318641<br>CN332418 DA725637<br>DC402614 BU193825<br>CN332379 DC376684<br>BP357790 BI860215<br>DA459067 BM466504<br>BE779395 DA772594<br>CT001102 BM542391<br>BQ230971 BM800968<br>DA228134 BQ212875<br>DA313522 DA312195<br>BX646245 BQ233732<br>DA245951 BU176883<br>DA110270 BU182880<br>BE677943 CN332384<br>DA591061 BU194855<br>DB155439 CA397844<br>DA557663 DA946838<br>DA452527 BG779792<br>DC345413 DA442448<br>DA843411 DB275848 | AL703840<br>DB085617<br>DB060821<br>DB094565<br>DB094616<br>DB088474<br>DB061905<br>DB072583<br>DB066666<br>DB067061<br>DB040401 | AA473691 CO432697<br>CA324224 BE910962<br>CN719679 BF151173<br>BY727461 CF534583<br>CB520361 BI153120<br>BG914946 CB724029<br>CD350727 CN459235<br>CD350844 BI851953<br>AI613874 CN719697<br>CD351849 CB722996<br>CN715076 CD350984<br>BI107493<br>CF538935<br>CN721936<br>CF743451<br>CF743882<br>BG920508<br>CN536109<br>CF533910<br>CN718632<br>BQ946258<br>BU056599<br>CN721082<br>CN721104<br>CF742695 | CJ047704                        |  |
| NRF                        | AL539002 BI554152<br>BG741433 BI836552<br>BI544578<br>BI599571<br>BG705887                                                                                                                                                                                                                                                                                                                                                                                                                                                                | DR002872                                                                                                                         | BB639861 CN682396<br>BY278150 BI651980<br>BY124509 BE649905<br>CN665723 CO039677<br>BY721709                                                                                                                                                                                                                                                                                                                | —                               |  |
| XIAP                       | BX504682 AL713196<br>CN418981 DA579006<br>DN996652 AU098645<br>DA316362 BQ423165<br>DA660376<br>BM459898<br>DB113777<br>DB221781                                                                                                                                                                                                                                                                                                                                                                                                          | BX119811                                                                                                                         | BY025626 CJ121305<br>CJ112453 CJ123526<br>CJ108763 CJ123913<br>CJ111937 CJ124104<br>BY322480 CJ125313<br>CJ119840 BB653654<br>CJ119934 CJ129505<br>CJ120265 CJ126958                                                                                                                                                                                                                                        | BQ552033                        |  |

Shown are the accession numbers for all ESTs in the human and mouse UniGene clusters for the eIF4G, NRF and XIAP genes that contain at least 8 bp on each side of the identified 3' ss, grouped according to whether the ss had or had not been used. A dash mark indicates that no ESTs in that category were found.
