# Supplementary material
Source: PubMed Central journal article supplement (PMC2290820)
Supplement: pnas_0710650105_13.pdf [file pnas_0710650105_13.pdf]

**Table 3. Additional cellular mRNAs containing putative IRESs which harbor 3' splice sites that are utilized in some ESTs**

| mRNA          | Reference | Accession no. (IRES coordinates) | ESTs                                                                                                                                         |                                                                                                                                              |                                                                                                                                              |                                                                                                                                              |                                                                                                                                  |
|---------------|-----------|----------------------------------|----------------------------------------------------------------------------------------------------------------------------------------------|----------------------------------------------------------------------------------------------------------------------------------------------|----------------------------------------------------------------------------------------------------------------------------------------------|----------------------------------------------------------------------------------------------------------------------------------------------|----------------------------------------------------------------------------------------------------------------------------------|
| AQP4          | 1         | U63613.1 (385-661)               | DB464669<br>DB467254<br>DB463530<br>DB493086<br>DB466277<br>DA184956<br>DB482441<br>DB489056<br>DB504304<br>DB471270<br>DB464013<br>DB494954 | DB476774<br>DB470608<br>DB483993<br>DB467482<br>DB476176<br>DB477840<br>DB505494<br>DA363692<br>DA106411<br>DB474975<br>AL119013<br>DA114585 | DA407305<br>DA165032<br>DA250127<br>DA302696<br>DA301370<br>DA097668<br>DA347789<br>DA184371<br>DA144076<br>DA245095<br>BI667387<br>DA196278 | DA410181<br>DA074426<br>DA403082<br>DA288362<br>DA158375<br>DA269557<br>DA181411<br>DN994669<br>DA105518<br>DA106902<br>BG699279<br>DC324259 | EL735612<br>CK001830<br>BI597395<br>CK001465<br>BI548956<br>BI766584<br>BG570123<br>DN990376<br>BI596912<br>BG483248<br>BG713949 |
| BCL2          | 2         | M13994.1 (322-1458)              | BE935192<br>AW468867<br>BE675587                                                                                                             | BQ055950<br>BQ642891<br>BQ641946                                                                                                             | BQ643236<br>BQ061355<br>BG258362                                                                                                             | BQ056709<br>BQ054417<br>BQ061909                                                                                                             | BQ059398<br>BQ055296                                                                                                             |
| $\beta$ Pix-b | 3         | AY220301.1 (1-372)               | CF727976<br>CD351109<br>BF460967<br>BF464493                                                                                                 | AW125823<br>BE948440<br>BE981606<br>BE981169                                                                                                 | BE981794<br>BU708921<br>BM934666<br>CD347827                                                                                                 | CB247113<br>BB640337<br>BY130038<br>BY124167                                                                                                 | BY733770<br>CB247537<br>CB247857<br>CB518832                                                                                     |
| DAP5          | 4         | NM_001418.3 (112-417)            | DA738673<br>BU934308<br>BP360255<br>DA454216<br>DB151883                                                                                     | DB223988<br>DA238112<br>BP236076<br>DA595628<br>DA716637                                                                                     | DA781947<br>DA861822<br>BP351259<br>DB218010<br>BP355984                                                                                     | DA754740<br>DB062898<br>DA755241<br>DB066976<br>DA713238                                                                                     | DA443109<br>DB100387<br>DA775905<br>DA406135<br>DA742886                                                                         |
| Dendrin       | 5         | NM_030993.1 (1-148)              | BY341635<br>BY342232                                                                                                                         | BY338481                                                                                                                                     | BY338973                                                                                                                                     | BY338055                                                                                                                                     | BY336840                                                                                                                         |
| ELG1          | 1         | AK125048.1 (755-1219)            | BF974719                                                                                                                                     | AI630669                                                                                                                                     |                                                                                                                                              |                                                                                                                                              |                                                                                                                                  |
| HIAP2         | 6         | NM_001166.3 (1314-1462)          | DA156116                                                                                                                                     | DA528255                                                                                                                                     |                                                                                                                                              |                                                                                                                                              |                                                                                                                                  |
| MTG8a         | 7         | NM_004349.2 (1-411)              | DA497184<br>DA787767<br>DR003282                                                                                                             | DA089681<br>DA476856                                                                                                                         | DA509818<br>DA779131                                                                                                                         | DA742066<br>DA506495                                                                                                                         | DA792706<br>DA500281                                                                                                             |
| ODC           | 8         | M16982.1 (120-423)               | CB797231<br>CB804585<br>EV774117<br>DY311762                                                                                                 | CB756991<br>CK599080<br>CB784474<br>CB747604                                                                                                 | DV214748<br>CK359865<br>CB770548<br>DY311939                                                                                                 | BP494576<br>EX491433<br>DN936828<br>CB613128                                                                                                 | CB784473<br>CB730247<br>CB724543<br>CB740531                                                                                     |
| SNM1          | 9         | D42045.1 (1-918)                 | DB067089<br>BP222025<br>DB224073                                                                                                             | DB221228<br>DA852845                                                                                                                         | DA101887<br>BI259185                                                                                                                         | BE018222<br>DB093317                                                                                                                         | DA111529<br>DB093317                                                                                                             |
| UNR           | 10        | NM_001007553.1 (36-466)          | DA831304                                                                                                                                     | BM834027                                                                                                                                     | DA096635                                                                                                                                     | DA405185                                                                                                                                     | DA503049                                                                                                                         |
| Utrophin A    | 11        | AK134424.1 (195-701)             | BC011062                                                                                                                                     | BF099583                                                                                                                                     | CN679441                                                                                                                                     | CJ055176                                                                                                                                     |                                                                                                                                  |

Shown are the names of the mRNAs, the references for the studies in which the IRESs were reported, the accession numbers for mRNA sequences containing the IRESs, and the accession numbers for ESTs in which a 3' splice site within the IRES sequence had been utilized. ESTs are from the same species as the originally described IRES, except for dendrin, for which mouse instead of rat ESTs are given. No rat ESTs corresponding to the dendrin IRES sequence were found at the time of the analysis.
