# Supplementary material
Source: PubMed Central journal article supplement (PMC2290820)
Supplement: pnas_0710650105_14.pdf [file pnas_0710650105_14.pdf]

**Table 4. Primers and probes used in RT-PCR****A. Primers used for standard RT-PCR of dicistronic constructs.**

| Primer target | Primer  | Sequence             |
|---------------|---------|----------------------|
| 5' UTR        | forward | ATTCCAAGCTGGCAACTTCC |
| GFP           | reverse | GACCAGGATGGGCACCAC   |

**B. Primers used for standard RT-PCR of viral constructs.**

| Primer pair/target | Primer  | Sequence                  |
|--------------------|---------|---------------------------|
| I                  | forward | GGGTCTCCTCTGAGTGATTGACTAC |
|                    | reverse | ACCCCGGTGAACAGCTCCTC      |
| II                 | forward | GCCCCATCAGGTCTTTAATGTA    |
|                    | reverse | ACCCCGGTGAACAGCTCCTC      |
| GFP                | forward | TGCCCGAAGGCTACGTCCAG      |
|                    | reverse | CCGATGGGGGTGTTCTGCTG      |
| $\beta$ -actin     | forward | GAGCACAGAGCCTCGCCTTTG     |
|                    | reverse | GCCTCGTCGCCACATAGGAA      |

**C. Primers and probes used for quantitative RT-PCR of viral constructs.**

| Primer pair/target | Primer or probe | Sequence                             |
|--------------------|-----------------|--------------------------------------|
| I                  | forward primer  | GGACCACCGACCCACCAC                   |
|                    | probe           | FAM-CATCGCCCTCGCCCTCGCCG-TAMRA       |
|                    | reverse primer  | AGGGTCAGCTTGCCGTAGG                  |
| II                 | forward primer  | CTTCAGACCAGGAACCGTATGTC              |
|                    | probe           | FAM-CATCGCCCTCGCCCTCGCCG-TAMRA       |
|                    | reverse primer  | AGGGTCAGCTTGCCGTAGG                  |
| III                | forward primer  | GTGGTCTCGCTGTTCCCTTG                 |
|                    | probe           | FAM-TGCCCGCCAGAGGTCTCCAGACTTCG-TAMRA |
|                    | reverse primer  | CGGTCCAGTTGTTCTTGGTAGG               |
| GFP                | forward primer  | AGCAAAGACCCCAACGAGAAG                |
|                    | probe           | FAM-CCTGCTGGAGTTCGTGACCGCCG-TAMRA    |
|                    | reverse primer  | GTCCATGCCGAGAGTGATCC                 |
| $\beta$ -actin     | forward primer  | CACAGAGCCTCGCCTTTGC                  |
|                    | probe           | FAM-CGTCCACACCCGCCGCCAGC-TAMRA       |
|                    | reverse primer  | CGTCGCCACATAGGAATCC                  |

All sequences are shown 5' to 3'. FAM, 6-carboxyfluorescein; TAMRA, 6-carboxytetramethylrhodamine.
