# Supplementary material
Source: PubMed Central journal article supplement (PMC2290820)

**A**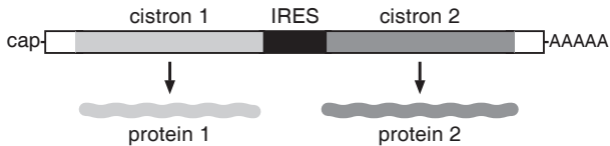**B**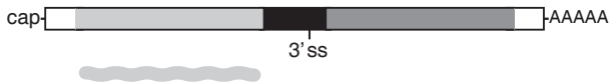**C**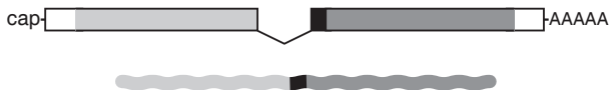**D**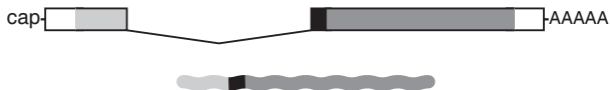**E**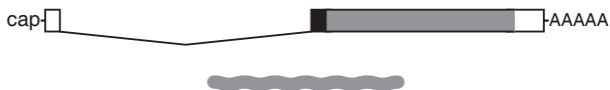

Supplement: pnas_0710650105_1.pdf [file pnas_0710650105_1.pdf]

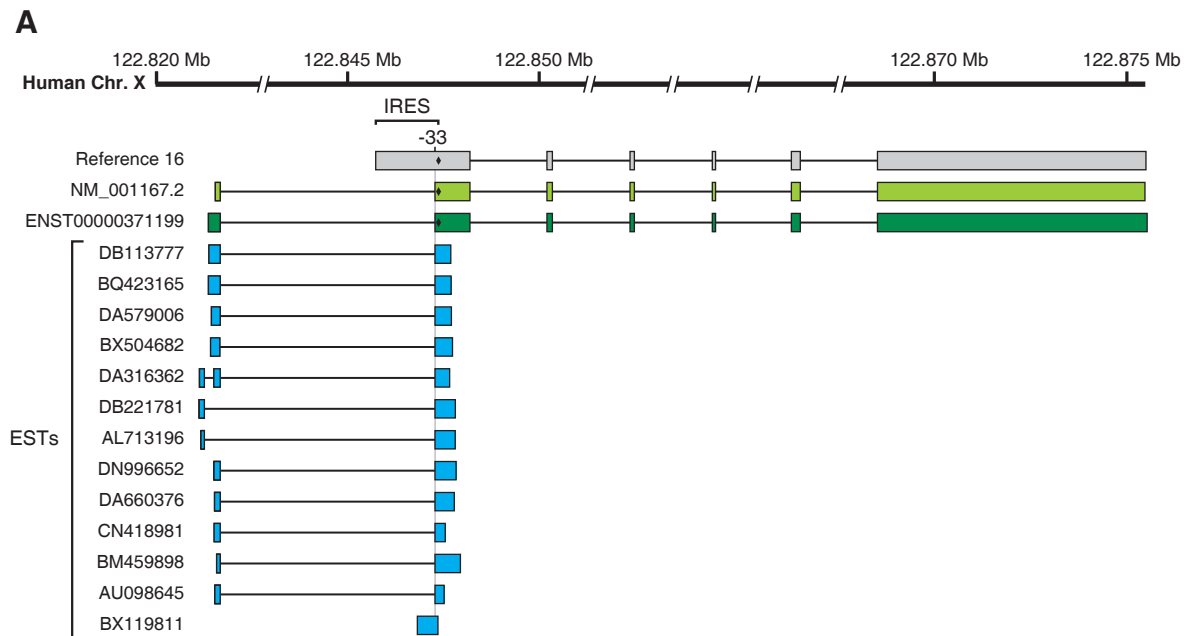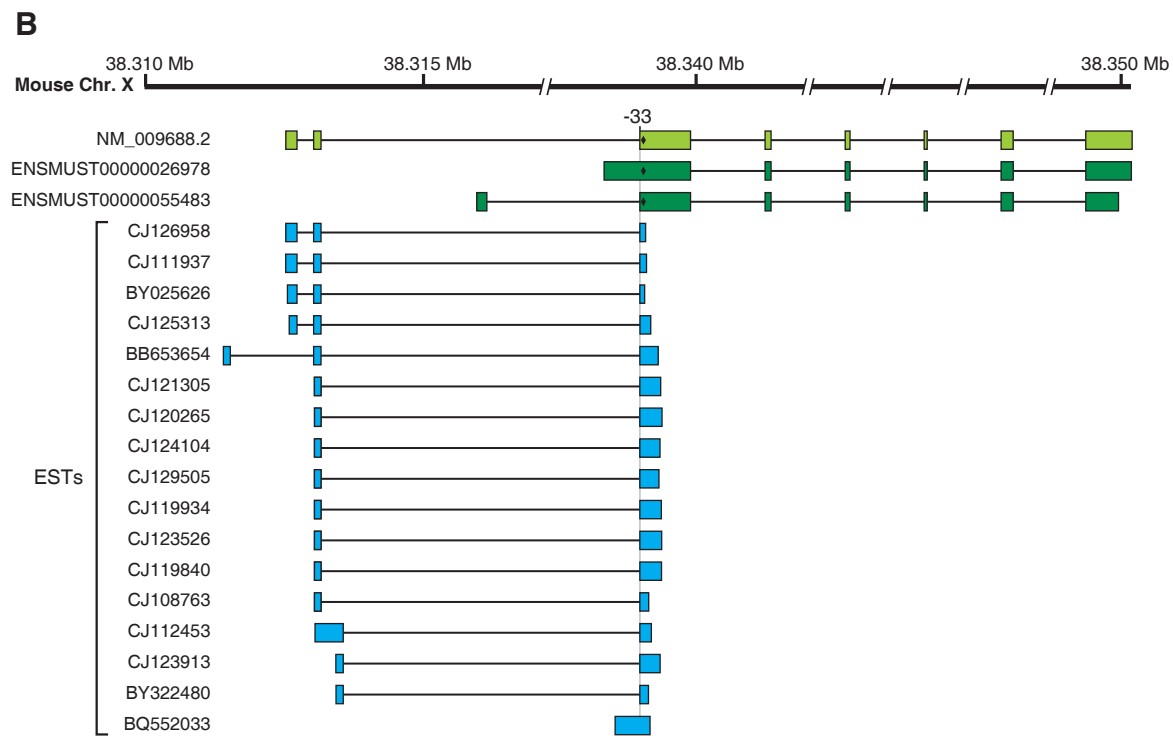

Supplement: pnas_0710650105_10.pdf [file pnas_0710650105_10.pdf]

**A**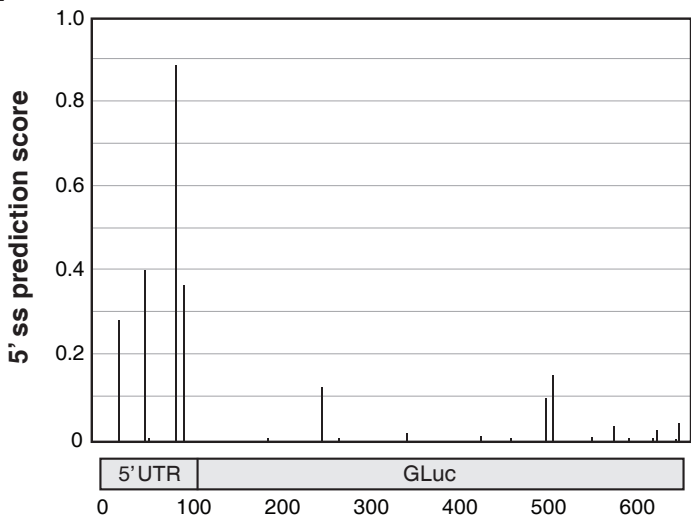**B**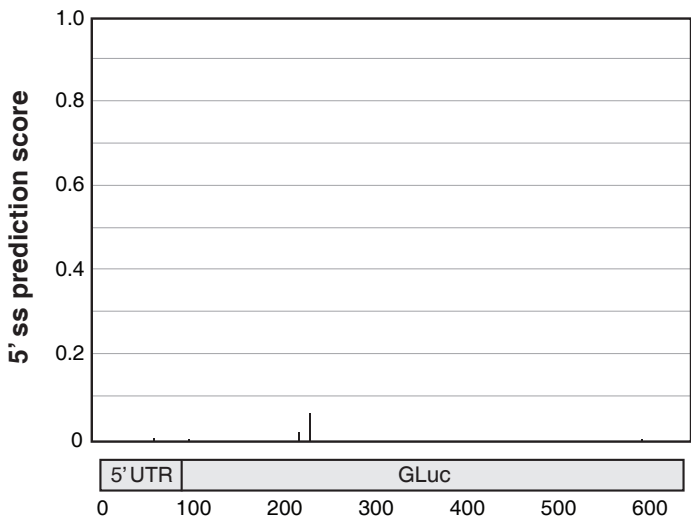

Supplement: pnas_0710650105_2.pdf [file pnas_0710650105_2.pdf]

**A**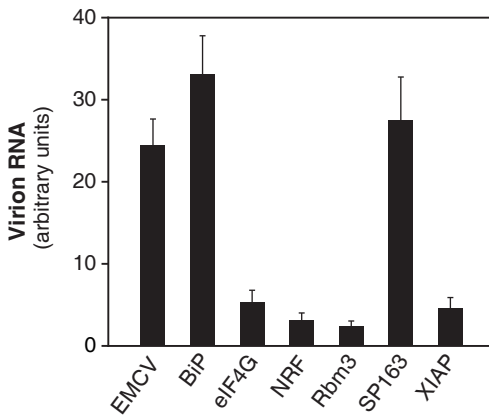**B**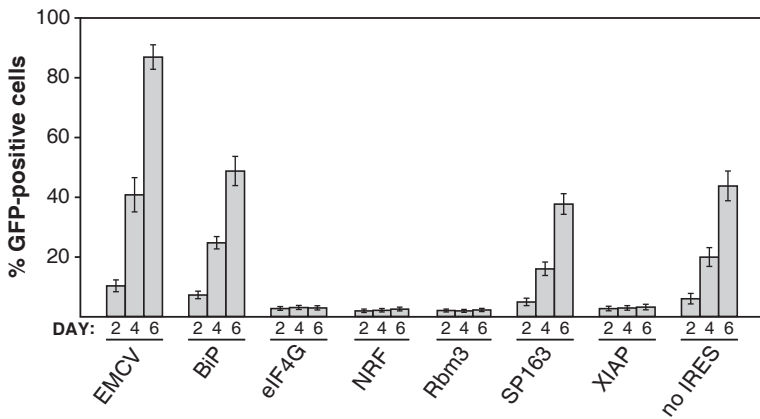

Supplement: pnas_0710650105_4.pdf [file pnas_0710650105_4.pdf]

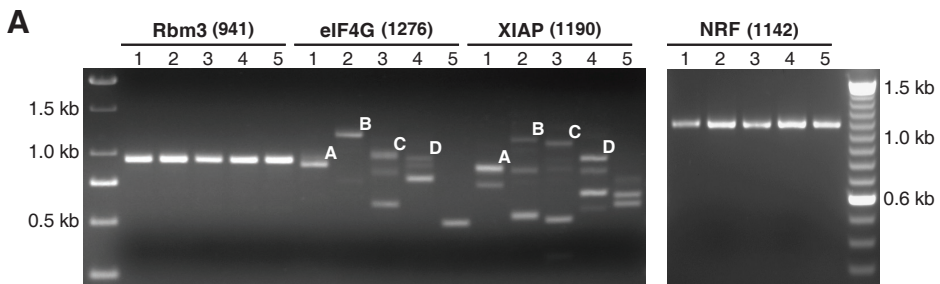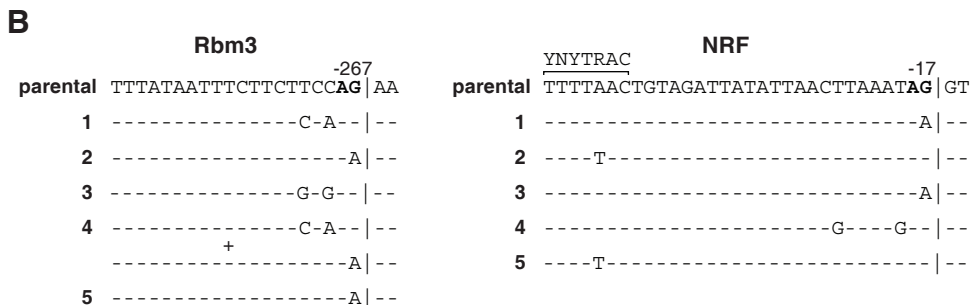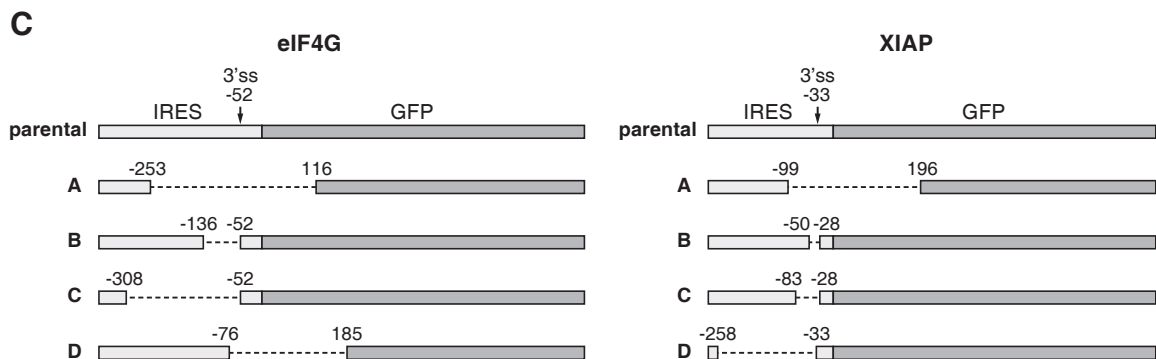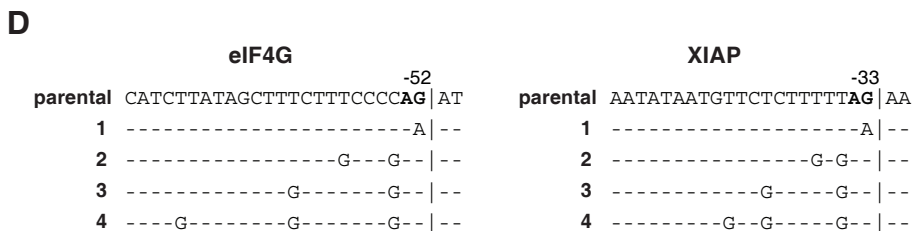

Supplement: pnas_0710650105_5.pdf [file pnas_0710650105_5.pdf]

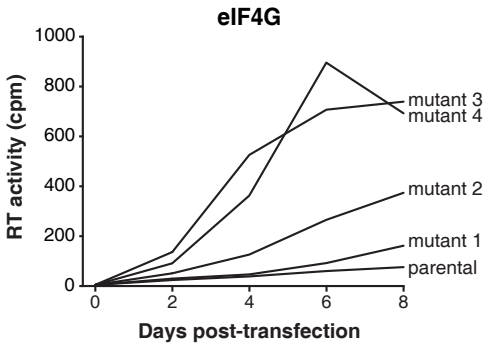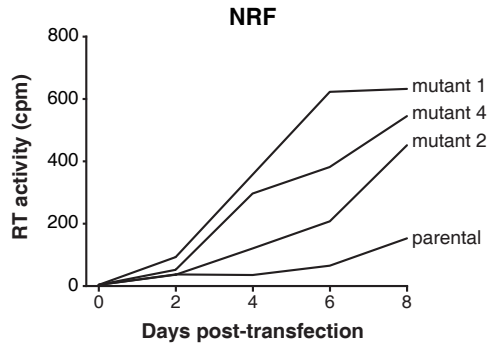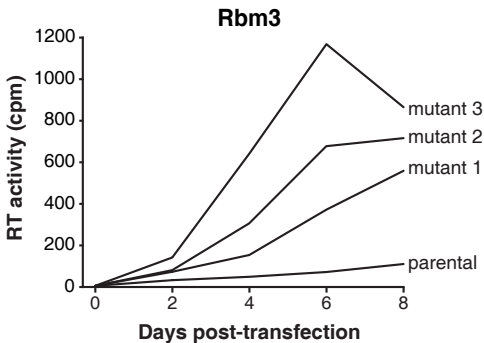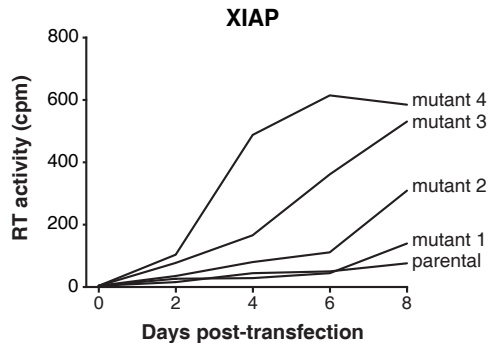

Supplement: pnas_0710650105_6.pdf [file pnas_0710650105_6.pdf]

**A**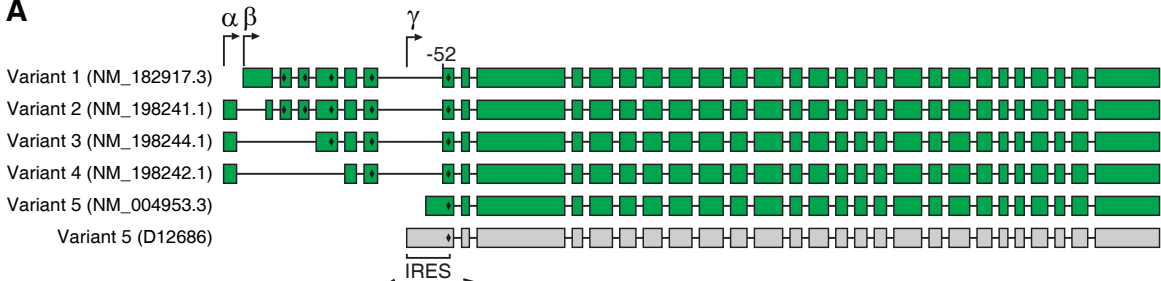**B**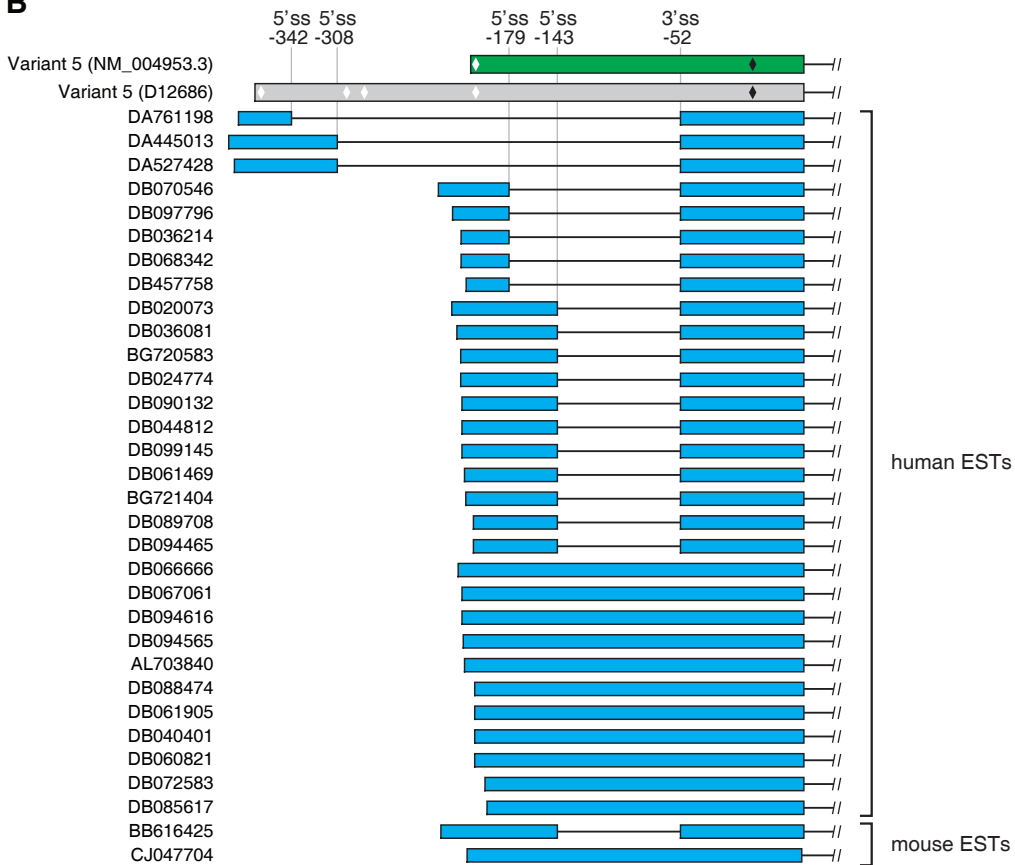

Supplement: pnas_0710650105_8.pdf [file pnas_0710650105_8.pdf]

**A**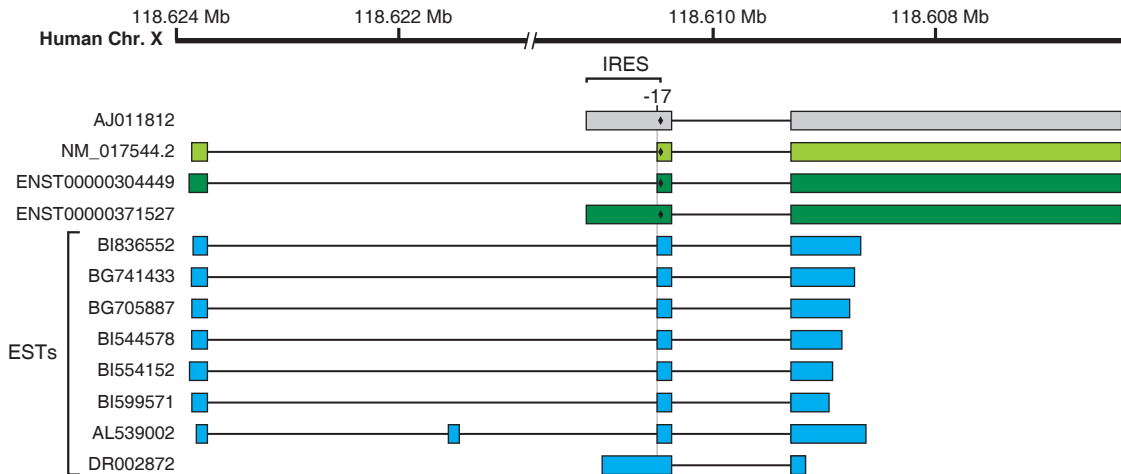**B**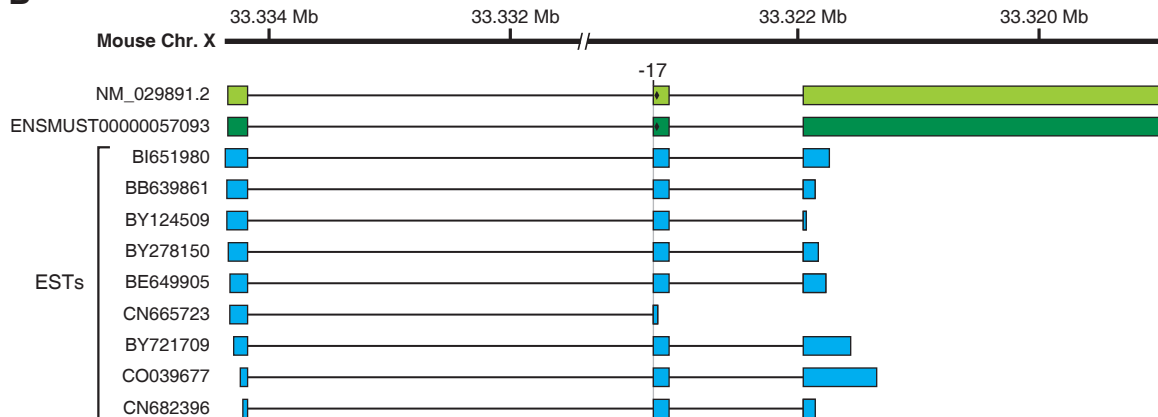

Supplement: pnas_0710650105_9.pdf [file pnas_0710650105_9.pdf]
